# Supplementary material for: Photoelectric properties of glass-ceramics containing KTb2F7 nanocrystals for UV detection
Source: Royal Society of Chemistry journal article supplement (doi:10.1039/d3ra05044k), 2023-01-01
Supplement: d3ra05044k1.pdf [file d3ra05044k1.pdf]

## Supplement information

# Photoelectric properties of glass-ceramics containing $\text{KTb}_2\text{F}_7$ nanocrystals for UV detection

Zhiguo Zhao<sup>#a</sup>, Xian Zhang<sup>#a, \*b</sup>, Xuying Niu<sup>a</sup>, Rui Zhang<sup>a</sup>, Zaijin Fang<sup>\*c</sup>, Zhi Chen<sup>d</sup>, and Hong Jia<sup>\*a, e</sup>

<sup>a</sup>College of Physics and Electronic Information & Henan Key Laboratory of Electromagnetic Transformation and Detection, Luoyang Normal University, Luoyang 471934, China.

<sup>b</sup>Department of Optoelectronics Science, Harbin Institute of Technology at Weihai, Weihai 264209, China.

<sup>c</sup>Guangdong Provincial Key Laboratory of Optical Fiber Sensing and Communications, Institute of Photonics Technology, Jinan University, Guangzhou 511443, China..

<sup>d</sup>Zhejiang Lab, Hangzhou 311100, China.

<sup>e</sup>Longmen Laboratory of Luoyang, 471000, Luoyang 471934, China

E-mail: jiahong517@aliyun.com, zxian18237988270@163.com and zaijin\_fang@163.com

# The authors contributed equally.

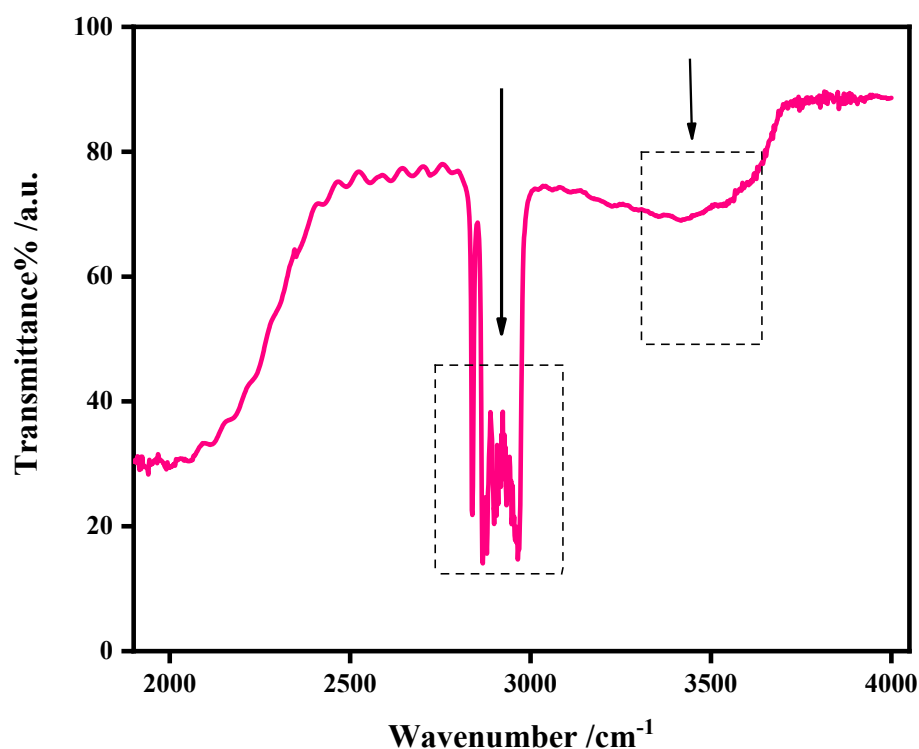

Fig. S1. FTIR spectrum of the glass-ceramics obtained after heat treatment.

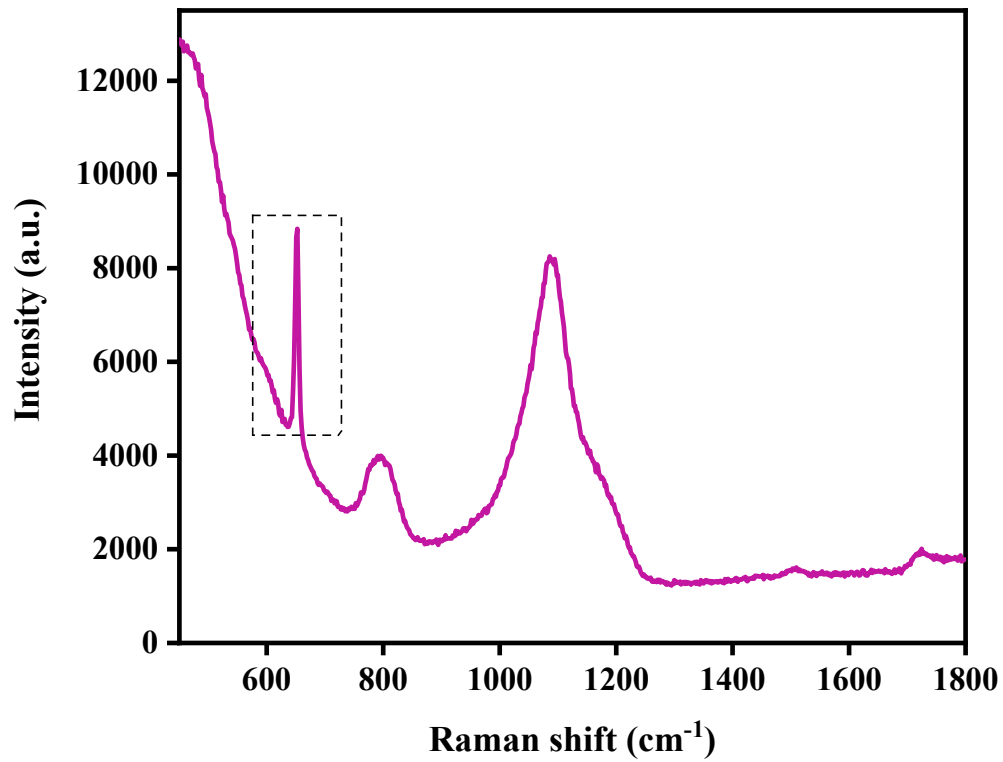

Fig. S1. Raman spectrum of the glass-ceramics obtained after heat treatment.

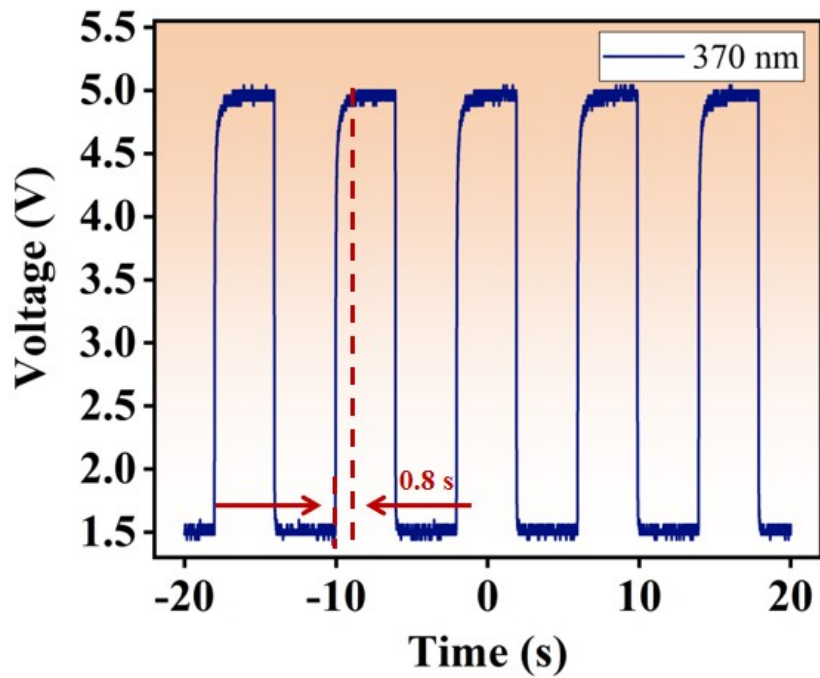

Fig. S3. Time-dependent photoresponse of the device based on the developed GC-based DC spectral converter under solar-blind UV light irradiation (370 nm).
